# Supplementary material for: Four-dimensional mesospheric and lower thermospheric wind fields using Gaussian process regression on multistatic specular meteor radar observations
Source: Copernicus journal article supplement (doi:10.5194/amt-14-7199-2021), 2021-11-17
Supplement: Supplementary file 1 [file amt-14-7199-2021-supplement.zip]

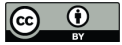

*Supplement of*

**Four-dimensional mesospheric and lower thermospheric wind fields using Gaussian process regression on multistatic specular meteor radar observations**

**Ryan Volz et al.**

*Correspondence to:* Ryan Volz (rvolz@mit.edu)

- amt-14-7199-2021-supplement-title-page.pdf
- movieS1.gif

The copyright of individual parts of the supplement might differ from the article licence.
